# Supplementary material for: Genome Architecture Facilitates Phenotypic Plasticity in the Honeybee (Apis mellifera)
Source: PubMed Central journal article supplement (PMC7306700; doi:10.1093/molbev/msaa057), 2020-04-05
Supplement: msaa057_supplementary_data.pdf [file msaa057_supplementary_data.pdf]

Genome architecture facilitates phenotypic plasticity in the honeybee (*Apis mellifera*).

Elizabeth J. Duncan<sup>1,2\*</sup>, Megan P. Leask<sup>1\*</sup>, Peter K Dearden<sup>1§</sup>.

1 Genomics Aotearoa and Biochemistry Department.

University of Otago

Dunedin

Aotearoa-New Zealand

2 School of Biology,

Faculty of Biological Sciences,

University of Leeds,

Leeds LS2 9JT

UK

\*These authors contributed equally to this work

§To whom correspondence should be addressed.

**This PDF file includes:**

Supplementary Text

Supplementary Figures S1 to S11

1. Properties of plasticity associated gene clusters.
2. Gene clusters in common between published honeybee gene expression datasets.
3. Graph summarising the evolutionary history plasticity-related clusters
4. Summary of the evolutionary history of an example plasticity-related cluster.
5. Full western blot
6. Food intake and Kaplan-Meier survival curves for DZNep treated bees.
7. Patterns of enrichment of H3K27me3 amongst individual genes within the clusters.
8. Genome wide patterns of H3K27me3 in honeybee ovaries
9. Validation of RNA-seq by RT-qPCR.
10. ChIP-qPCR validation of ChIP-seq data.
11. Cell type enrichment of H3K27me3 in honeybee ovaries

40 Supplementary Tables S1 to S6

- 41 1. Clusters of genes more highly expressed in queen-right worker ovaries as compared with queen-less  
42 worker ovaries
- 43 2. Clusters of genes more highly expressed in queen-less worker ovaries as compared with queen-right  
44 worker ovaries
- 45 3. Clusters of genes more highly expressed in queen-less worker ovaries (as compared with queen  
46 ovaries
- 47 4. Sequencing and mapping statistics for RNA-seq and CHIP-seq data.
- 48 5. Clusters of genes associated with differential expression in previously published *A. mellifera* RNA-  
49 seq datasets
- 50 6. Oligonucleotide primer sequences used in this study

51

52

53

54

55

56  
57  
58  
59  
60  
61  
62  
63  
64  
65  
66  
67  
68  
69  
70  
71  
72  
73  
74  
75  
76  
77  
78  
79  
80  
81  
82  
83  
84  
85  
86  
87  
88  
89  
90  
91  
92  
93  
94  
95  
96  
97

## **Supplementary text**

### **Clusters of genes found when comparing gene-expression in queen ovaries and queen-less worker ovaries.**

In this comparison very few genes were differentially expressed (Figure 1A). However, amongst the 27 genes that were more highly expressed in queen-less worker bee ovaries (as compared with queen) a single cluster of genes was detected. This cluster consists of three closely linked genes (Supplementary Table 3) spans 15,882 bp of the genome. These sequences are highly similar at the sequence level indicating they have arisen as a result of gene duplication. Phylogenetic analyses indicates recurrent duplication of these genes across the hymenoptera, with little sequence divergence. The phylogenetic relationships between these sequences don't recapitulate the species tree consistent with recurrent and gene conversion. We don't therefore include the analysis of this cluster in any further analyses.

### **Genome features associated with differential enrichment of H3K27me3**

Mapping peaks of H3K27me3 enrichment to gene features across the honeybee genome in worker, active worker and queen ovaries indicates that this mark is most commonly found in intronic and distal intergenic regions, and that this global enrichment pattern is consistent between the three ovary states (Supplementary Figure 8A). Peaks of H3K27me3 are detected just 3' of transcriptional start sites of genes in queen, queen-less worker and queen-right worker ovaries (Supplementary Figure 8B), consistent with analyses of H3K27me3 enrichment in ants (Simola, et al. 2013).

Relative to background, we see more differential peaks than expected enriched in promoter regions of genes in both queen-right and queen-less worker ovaries (Supplementary Figure 8C).

As H3K27me3 marks often appear in broad peaks that may be difficult to detect using peak calling software (Pauler, et al. 2009), we also used a sliding window approach (Shen, et al. 2013) to identify regions of differential enrichment (Supplementary Figure 8D). Differentially enriched peaks (Supplementary Figure 8C) were associated with different genomic features than differentially enriched windows (Supplementary Figure 8D) which may reflect the fact that sharper regions of enrichment, more likely to be called as peaks, are associated with particular genomic features, including promoter regions (Supplementary Figure 8A).

Comparing genomic windows enriched for H3K27me3 revealed a complex pattern of dynamic changes in the transition from queen-right to queen-less worker ovaries (Supplementary Figure 8D). Queen-right workers have an over-representation of H3K27me3 enrichment in exons of genes and first introns relative to background and queen-less workers, which may reflect H3K27me3 mediated repression of gene expression (Simola, et al. 2016). Both queen-right and queen-less workers also have more H3K27me3 enrichment in distal intergenic regions than expected which may represent enhancer regions or chromatin domains (Evans, et al. 2016).

98 Despite observing very few differences in gene expression when comparing queen-less workers to queens  
99 (Fig 1A), we do see a number of differences in the H3K27me3 peaks in these tissues, however these  
100 differentially enriched peaks are not associated with any particular genomic feature (Supplementary Figure  
101 8E).

102

103 Comparing genomic windows differentially enriched for H3K27me3 between queen-less and queen-right  
104 tissues revealed a complex pattern of dynamic changes (Supplementary Figure 8F), with a similar numbers  
105 of differentially enriched windows identified for this comparison as for the comparison of queen-right and  
106 queen-less worker ovaries (Supplementary Figure 8D), indicating differences in the H3K27me3 epigenetic  
107 landscape that is not reflected in gene expression (Figure 1A). In particular we see more highly enriched  
108 windows in queens associated with exonic regions, and in queen-less workers in intronic and distal  
109 intragenic regions, but the biological significance of these differences remains to be determined.

110

111 Network analysis of genes with differential enrichment of H3K27me3 in queen-less workers (Supplementary  
112 Figure 8G) and queens (Supplementary Figure 8H) didn't identify any key hubs in these regulatory networks  
113 unlike the analysis performed for queen-right and queen-less workers (Figure 5). This may indicate that  
114 differences in the epigenetic landscape seen between queen and queen-less worker tissue are independent  
115 of gene expression (consistent with our RNA-seq data, Figure 1) and may reflect a role unrelated to gene  
116 expression for H3K27me3 in these tissues.

117

118

### 119 **Localisation of H3K27me3 within ovarian cell types**

120 Honeybee ovaries are made up of different cell types (Supplementary Figure 11A), so we examined  
121 localisation of H3K27me3 using immunofluorescence to identify cell-type specific shifts in H3K27me3  
122 (Supplementary Figure 11B).

123

124 In all three tissue types; queen, queen-right worker and queen-less worker ovaries, H3K27me3 is present at  
125 high levels in the cells of the terminal filament adjacent to the region where oocytes are specified (left panels  
126 Supplementary Figure 11B).

127

128 H3K27me3 is also present at high levels in the oocyte nucleus in early-oogenesis in queen and queen-less  
129 ovary tissue (stage 1, Supplementary Figure 11B, (Wilson, et al. 2011)); likely reflecting a role in  
130 transcriptional silencing of the oocyte (Iovino, et al. 2013; Prokopuk, et al. 2017).

131

132 H3K27me3 is also enriched in nuclei of terminal filament cells of repressed worker ovaries, however high  
133 levels of H3K27me3 are detected in nuclei of cells within the germarium where oocyte specification would be  
134 expected to take place. In the vitellarium of repressed worker ovaries, multiple nurse cells surrounding the  
135 arrested oocytes contain high levels of H3K27me3 and H3K27me3 in the oocyte nuclei is reduced, which  
136 may indicate misspecification of cell types in late oogenesis (Bottom Right Panel, Supplementary Figure  
137 11B).

138

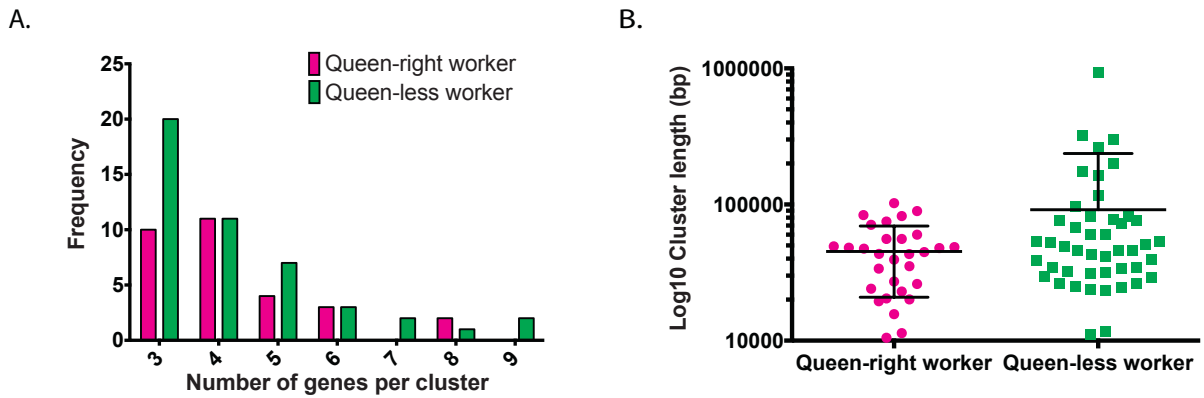

140

141 **Figure S1 – Properties of plasticity associated gene clusters.**

142 There was no statistically significant difference between the number of genes in a cluster (A) or the cluster  
 143 lengths (B) between clusters in which expression is higher in queen-right worker (magenta) ovaries  
 144 compared to clusters in which expression is higher in queen-less worker (green) ovaries.  
 145

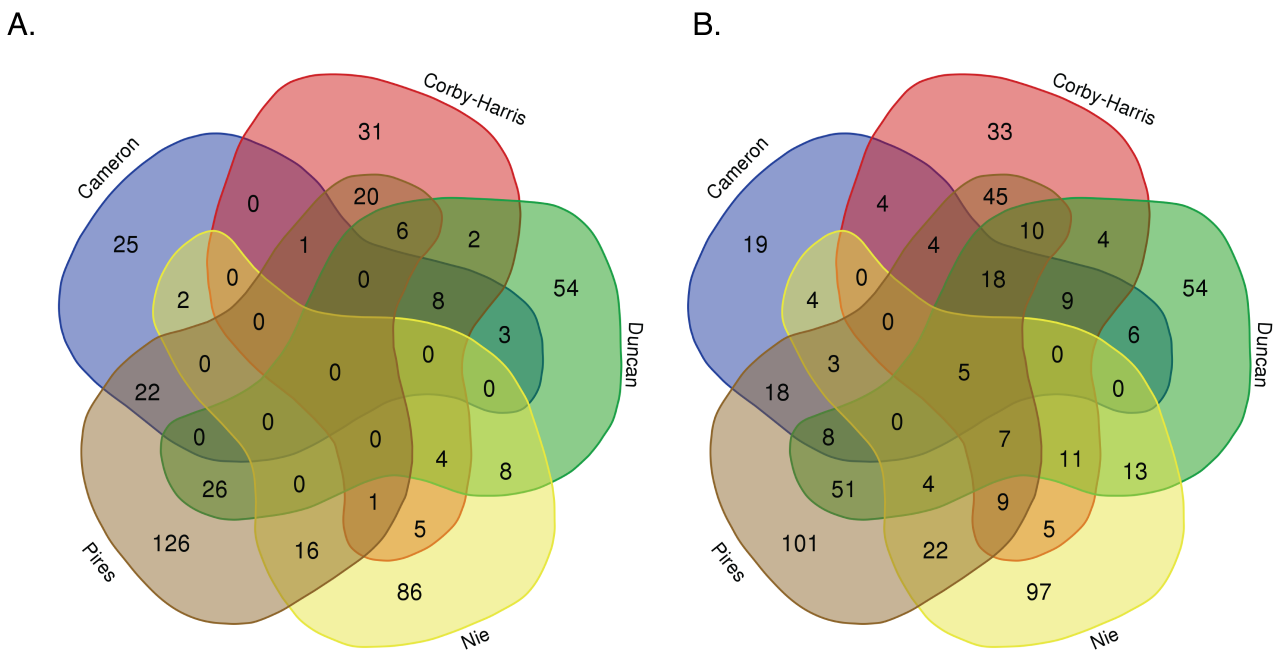

146

147 **Figure S2 – Gene clusters in common between published honeybee gene expression datasets.**

148 Venn Diagram showing overlap of gene clusters found in this study with those identified in previously  
 149 published *A. mellifera* datasets (Cameron, et al. 2013; Corby-Harris, et al. 2014; Pires, et al. 2016; Nie,  
 150 et al. 2018) using A) gene-based analysis, or B) window-based analysis in CROC (Pignatelli, et al.  
 151 2009). Full details of this analysis (including statistical analysis of whether clusters are over- or under-  
 152 represented in these datasets) is provided in Supplementary Table 5.

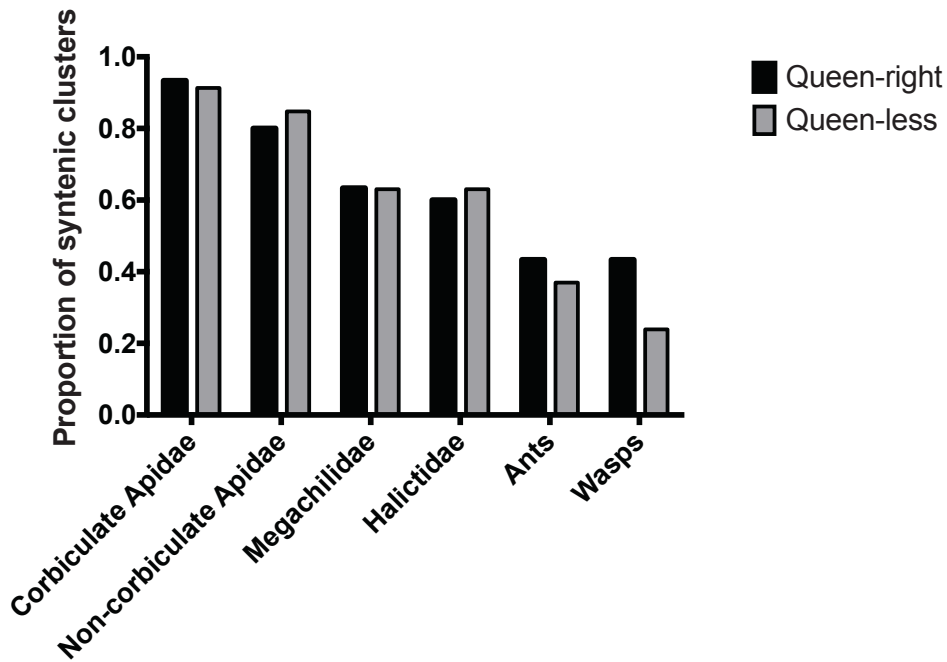

153

154 **Figure S3 – Graph summarising the evolutionary history plasticity-related clusters**

155 Bar graph showing the proportion of gene clusters identified in our honeybee RNA-seq data set (Table 1,  
 156 Figure 2) that are conserved at the level of 75% conservation of gene order in other hymenopteran groups.  
 157 Clusters of genes that are more highly expressed in queen-right worker ovaries ‘QMP responsive clusters’  
 158 (dark bars) have a similar evolutionary history as compared with clusters that are more highly expressed in  
 159 queen-less worker ovaries ‘Plasticity responsive clusters’, except that more of the queen-right worker  
 160 clusters are conserved at greater evolutionary distances, in particular in wasp species (divergence time ~140  
 161 mya (Misof, et al. 2014)).

162

163

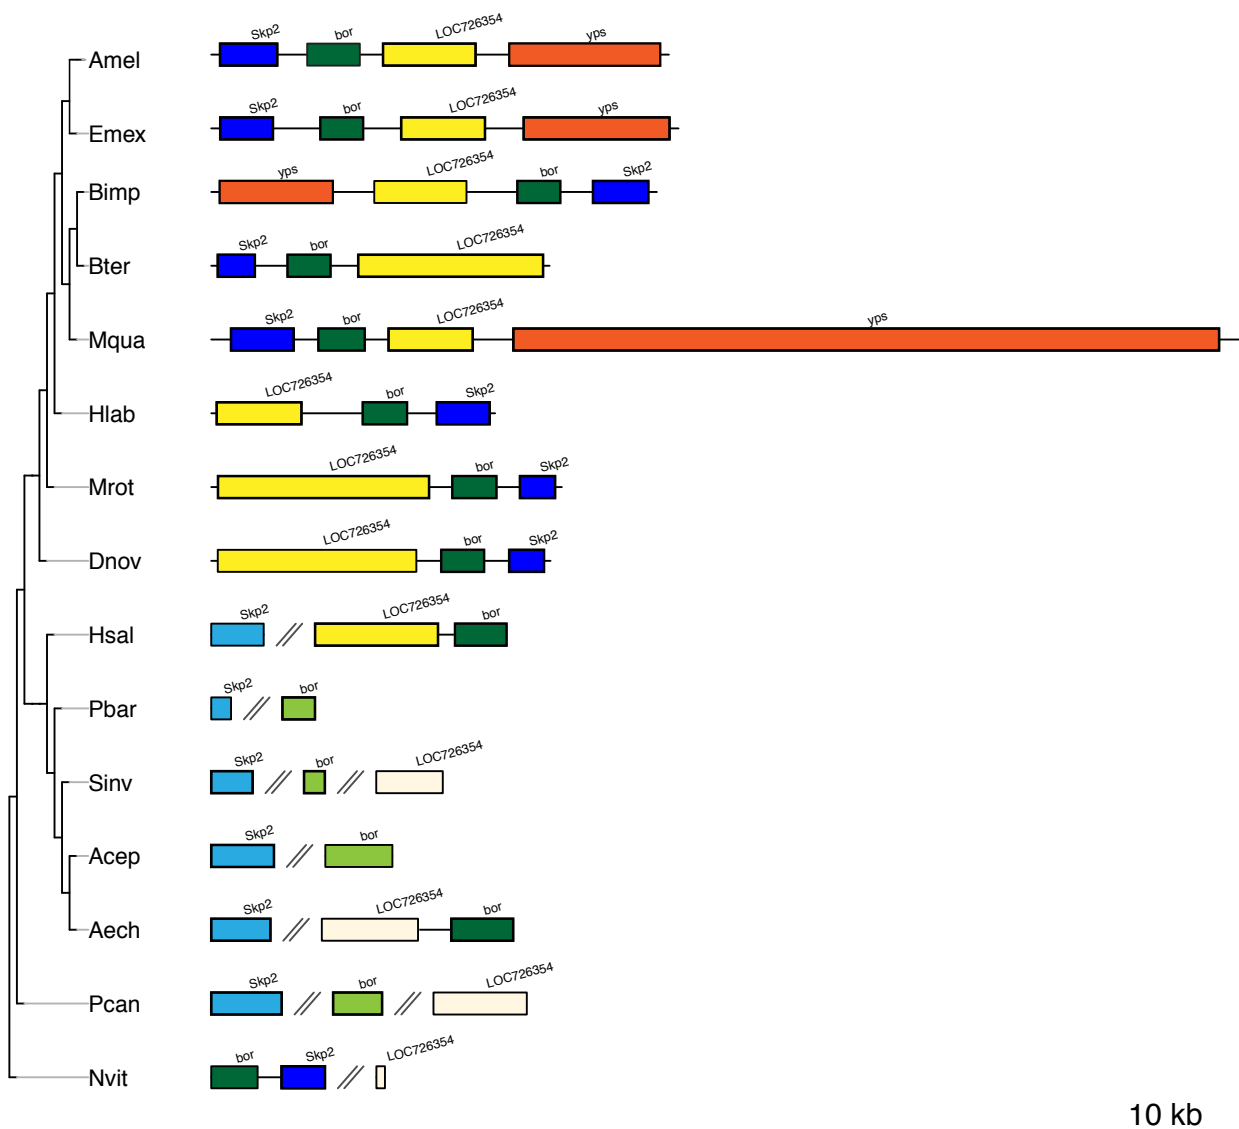

164  
 165  
 166  
 167  
 168  
 169  
 170  
 171  
 172  
 173  
 174  
 175  
 176

**Figure S4 – Summary of the evolutionary history of an example plasticity-related cluster.**

In honeybees this gene cluster consists of four genes (Skp2, bor, LOC726354 and yps) that are located on LG16 (NW\_003377872.1) with the cluster spanning 23.3 Kb. The figure shows a stylised phylogeny of hymenopteran species used in this study to examine the evolution of the gene clusters by determining the conservation of gene order. Orthogs are indicated by colour Skp2 (blue), Bor (green), LOC726354 (yellow) and yps (orange). When genes are joined by a solid line, this indicates that these genes are linked in that species and the use of a breakpoint indicates that the orthologs are present on a different chromosome or contig indicating that gene order is not conserved. Scale (10 Kb) is shown at bottom right to give an indication of the relative sizes of the genes (intron and exon sequences) and cluster in each species.

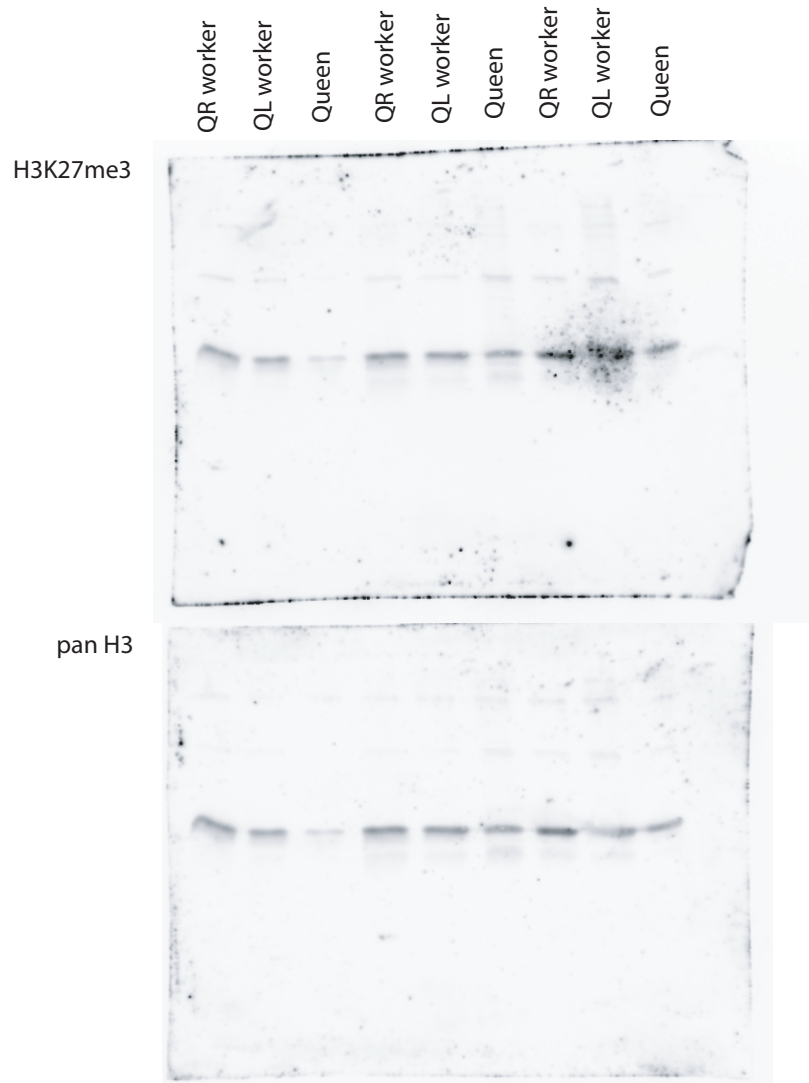

177  
 178  
 179  
 180  
 181  
 182  
 183  
 184  
 185  
 186  
 187  
 188  
 189  
 190  
 191  
 192  
 193

**Figure S5 – Full western blot**

Figure shows full Western blot analysis of ovary histone extracts for enrichment of H3K27me3 in queen, queen-right worker and queen-less worker ovary (as shown in Figure 3). The membrane was stripped and re-probed with Pan H3 antibody as the loading control. Western shows 5  $\mu$ g of histone extract from queen-right worker, queen-less worker (score 3) and queen and was carried out in triplicate. H3K27me3 was used at 1:200 and anti-mouse-HRP secondary antibody was used at 1:1000.



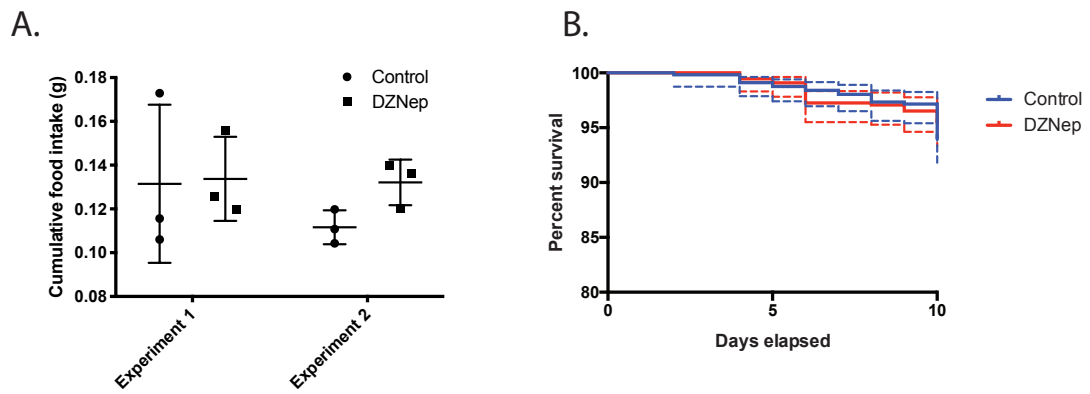

194

195

**Figure S6 – Food intake and Kaplan-Meier survival curves for DZNep treated bees.**

196

In the absence of QMP, supplementation of the diet with DZNep had no significant effect on food intake (A,

197

circles = solvent control (water), squares = DZNep treated) or survival (B) as compared with the solvent

198

control. Dotted lines on Kaplan-meier survival curves are 95% confidence intervals. Statistical significance

199

for food intake was measured using t-tests with a Holm-Sidak correction for multiple testing and for survival

200

was measured using a log rank test.

201

202

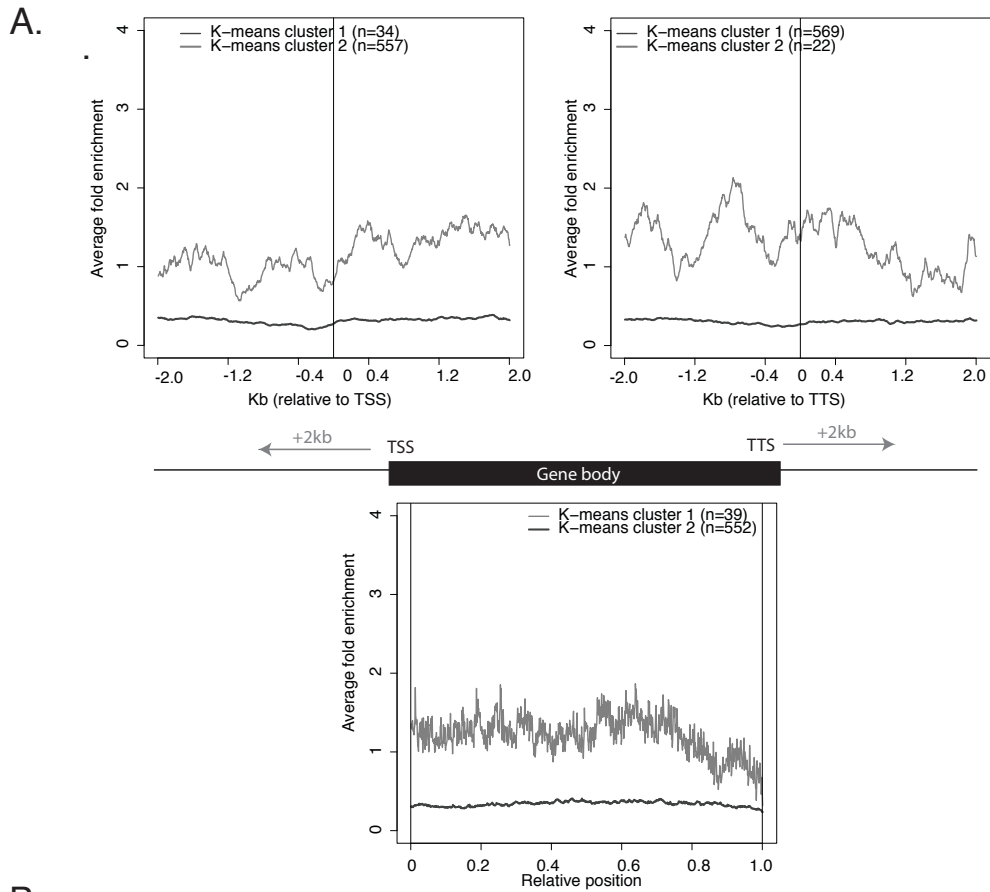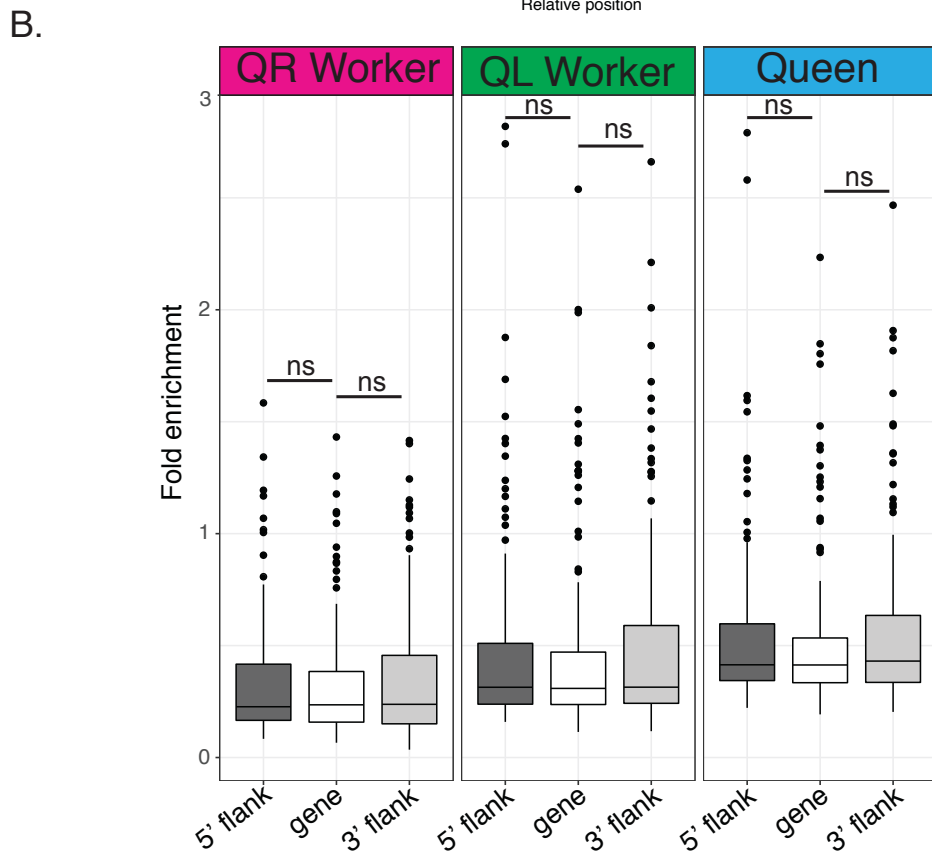

203

204

205

206

**Figure S7 – Patterns of enrichment of H3K27me3 amongst individual genes within the clusters.** To determine if the pattern observed in Figure 4 is an artefact associated with the way that individual genes are marked with H3K27me3, we examined the pattern of H3K27me3 within genes associated with gene clusters.

207 A) We first examined the H3K27me3 enrichment flanking the transcriptional start site (TSS), and  
208 transcriptional termination site (TTS) as well as across the gene body. The enrichment of H3K27me3 was  
209 found to show two patterns across these genes, with the majority of genes (n indicated in diagram) showing  
210 little change in H3K27me3 enrichment across the gene body, TTS or TSS. Some genes were however more  
211 dynamic in their H3K27me3 enrichment showing peaks of enrichment near the TSS and proximal to the TTS  
212 and a general decrease in enrichment towards the 3' end of the gene body. B) We also examined whether  
213 individual genes showed higher enrichment for H3K27me3 in the flanking regions as opposed to the gene  
214 bodies (as seen for whole clusters Figure 4) for individual genes contained within the cluster. No significant  
215 differences (ns) in enrichment were found. We conclude that no pattern of enrichment observed within the  
216 individual genes can explain the patterns of H3K27me3 we see associated with the gene clusters (Figure 4)  
217 indicating that the observed pattern is not an artefact reflecting the way that individual genes are marked but  
218 a real biological phenomenon.  
219  
220

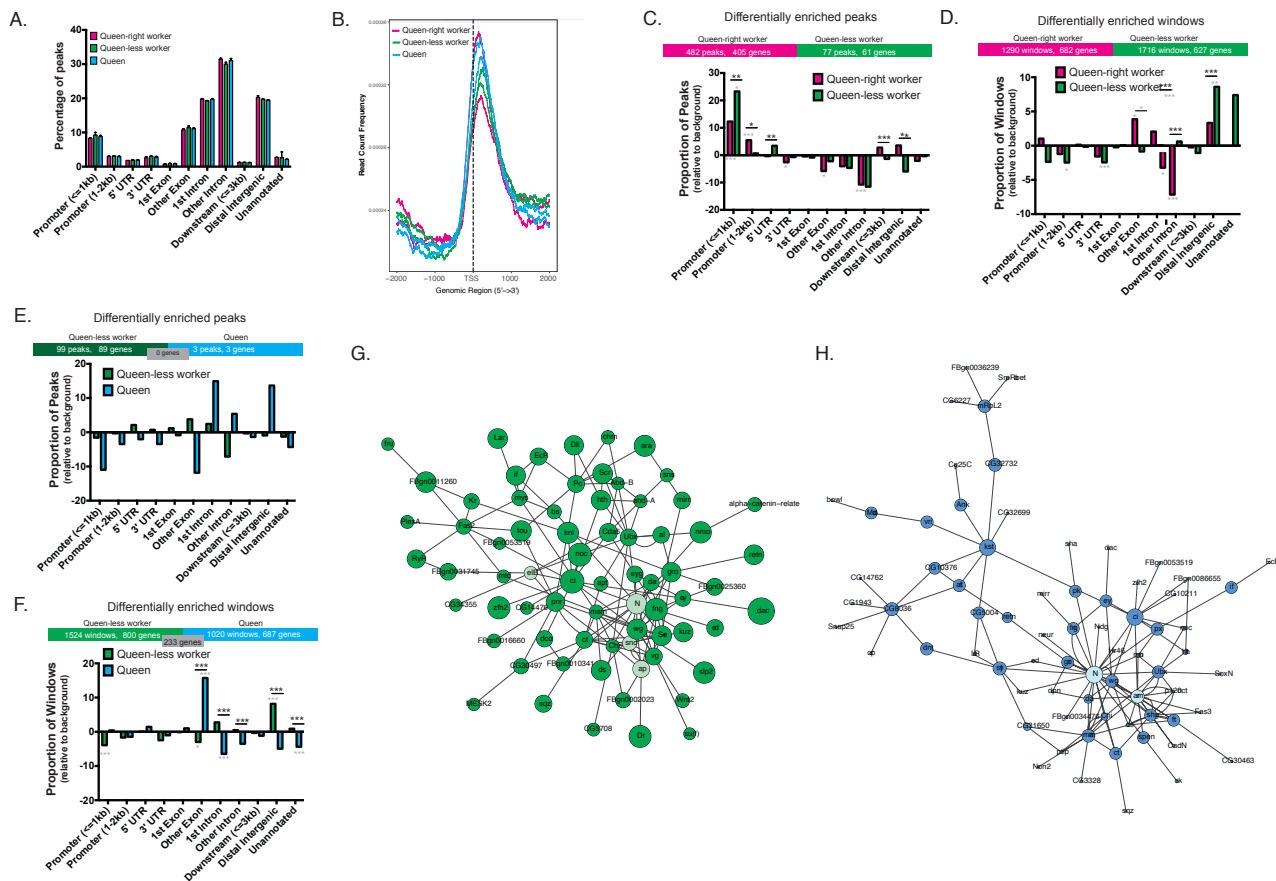

221

222

223

224

225

226

227

228

229

230

231

232

233

234

235

236

237

238

239

240

241

242

243

**Figure S8. Genome wide patterns of H3K27me3 in honeybee ovaries.** A) Across the genome the majority of H3K27me3 peaks are associated intronic and distal intergenic regions and there is no global shift in the genomic features that are associated with peaks between queen-right, queen-less and queen ovaries. B) Consistent with published data in other species H3K27me3 is enriched in a peak in all samples just distal to the transcriptional start site. C) Although we don't see a shift in global patterns of H3K27me3 with respect to queen-right and queen-less worker ovaries, when we examine individual peaks that are differentially enriched between these conditions we see that they are associated with different genomic features compared with background (significance indicated by grey asterisks) and also between queen-right and queen-less conditions (significance indicated by black asterisks). In particular, differentially enriched peaks are more associated with the promoter regions than we would expect (\*  $p < 0.05$ , \*\*  $p < 0.01$ , \*\*\*  $p < 0.001$ ). D) Similarly, we also see differences in H3K27me3 enrichment in genomic windows between queen-right and queen-less workers. Differentially enriched windows are more over-represented in exons in repressed workers and this shifts to over-representation in distal intergenic regions in activated-workers. E) Despite observing very few changes in gene expression (Figure 1) when comparing queen-less workers to queens, we do see a number of differences in the H3K27me3 peaks in these tissues, however these differentially enriched peaks are not associated with any particular genomic feature. F) We also see a substantial number of differentially enriched windows of H3K27me3 when comparing queen-less worker and queen ovarian tissue, indicating differences in the H3K27me3 epigenetic landscape that is not reflected in gene expression. In particular we see more peaks in queens associated with exonic regions, and in queen-less workers distal intragenic regions, but the biological significance of these differences remains to be determined. Significance indicated by asterisks, \*  $p < 0.05$ , \*\*  $p < 0.01$ , \*\*\*  $p < 0.001$ . Genes with higher levels of H3K27me3 enrichment in queen-less workers (green, G) and queens (blue, H) are indicated by darker coloured nodes. Interacting

244 genes (queen-less workers = light green and queen = light blue) were identified using the BioGRID database  
245 via DAVID (Huang, et al. 2009). Network analysis was performed using Cytoscape (Cline, et al. 2007). Note  
246 that in both networks Notch was identified as a key regulator, but based on centrality analysis there were no  
247 key nodes identified in these networks unlike those identified when comparing queen-right to queen-less  
248 workers (Figure 5). This may indicate that differences in the epigenetic landscape seen between queen and  
249 queen-less worker tissue are independent of gene expression (consistent with our RNA-seq data, Figure 1)  
250 and may reflect a role unrelated to gene expression for H3K27me3 in these tissues.

251

252

253

254

255

256

257

258

259

260  
261

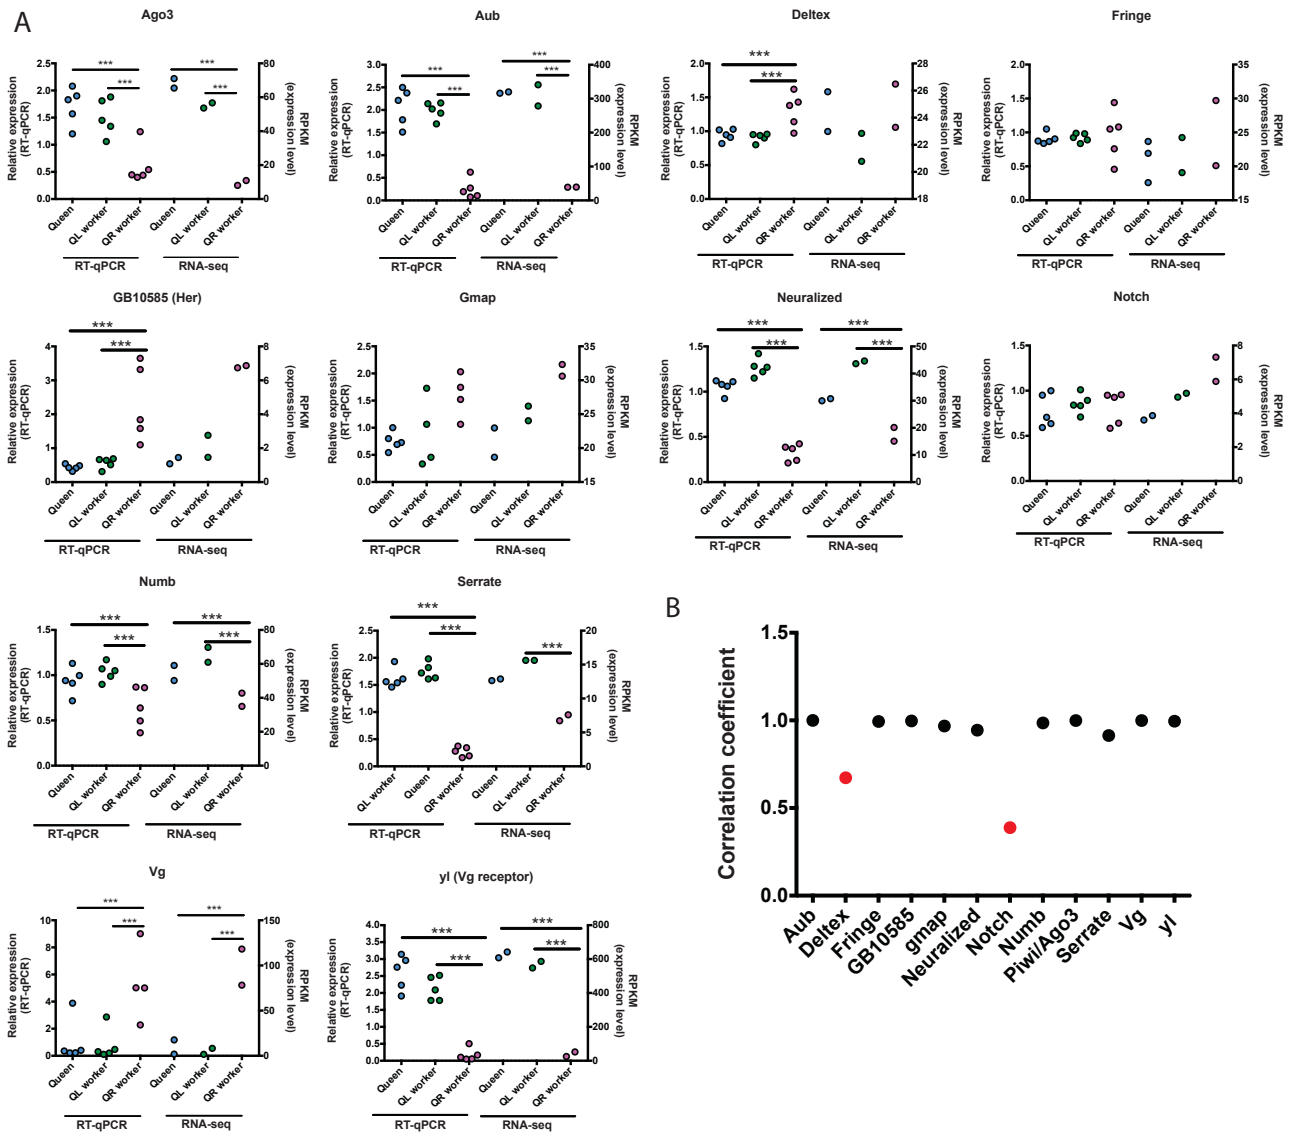

262  
263  
264

**Figure S9 – Validation of RNA-seq by RT-qPCR.**

265 Grpahs comparing the relative expression of selected genes determined by RT-qPCR (left hand set of three  
 266 samples) compared with RPKM determined from RNA-seq data (right hand set of three samples). In each  
 267 graph, data from queen ovaries is shown in cyan, queen-less workers in green and queen-right workers in  
 268 magenta. RT–qPCR data is the mean of five biological samples for each condition, RPKM is the mean of two  
 269 biological replicates per condition. Differences in gene expression in RT-qPCR data were determined by  
 270 analysis of variance with a Tukey’s post hoc test, and differences in gene expression in the RNA-seq data  
 271 were determined using a Baggerly test with an FDR correction for multiple testing. Statistical significance is  
 272 indicated above the bars (\*  $p < 0.05$ , \*\*  $p < 0.01$ , \*\*\*  $p < 0.001$ ) B) Graph of the Pearson correlation coefficients  
 273 generated by comparing RT-qPCR and RNA-seq data. Of the 12 genes tested in this study 10 are highly  
 274 correlated with respect to RT-qPCR and RNA-seq data, with only *deltex* and *Notch* showing different  
 275 patterns of expression in the RNA-seq and RT-qPCR data.

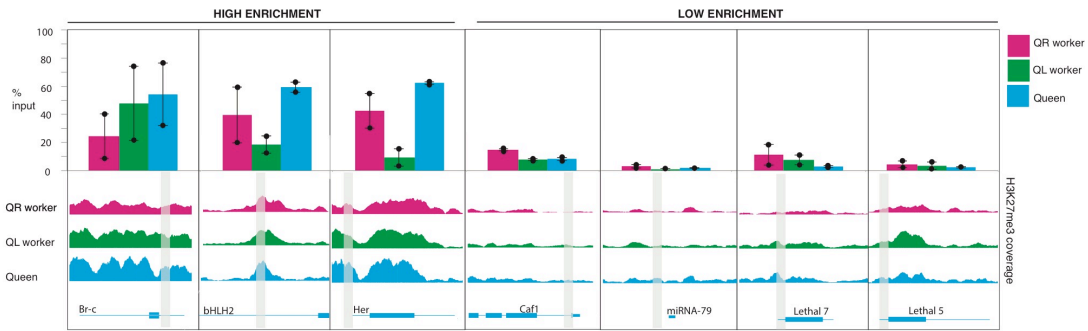

276

277

278 **Figure S10 – ChIP-qPCR validation of ChIP-seq data.** Three regions of high H3K37me3 and four regions  
 279 of low H3K27me3 enrichment were selected for validation by ChIP-qPCR. A) ChIP-qPCR validation is shown  
 280 in the bar graphs and error bars are the standard deviation of two biological replicates. B) ChIP-seq data for  
 281 the relevant regions is shown below the ChIP-qPCR data and the y-axis indicates fold-enrichment relative to  
 282 input (max = 4.0, sample size n = 2). C) Gene models are shown with the regions targeted by qPCR  
 283 indicated as grey boxes and primer sequences in Table S6.

284

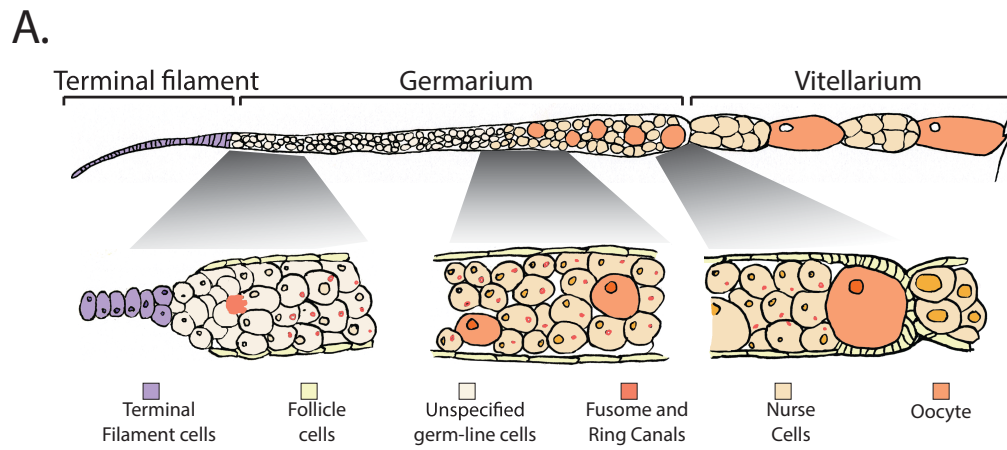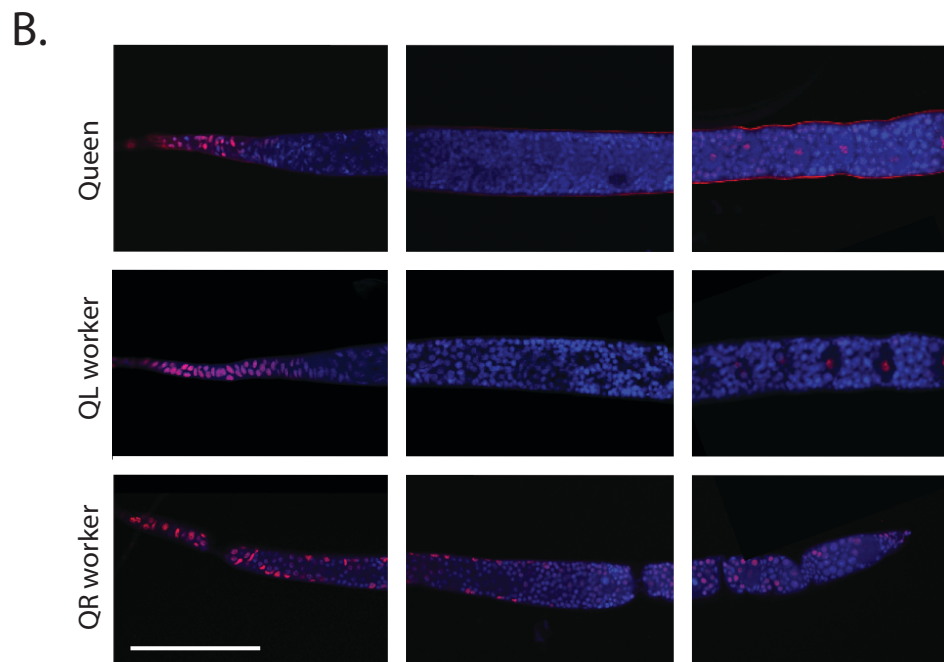

285

286

287

288

289

290

291

292

**Figure S11 – Cell type enrichment of H3K27me3 in honeybee ovaries** A) Schematic of the honeybee ovary illustrating general features of cell organization and the early stages of oogenesis in honeybee ovaries. B) Immunohistochemistry for H3K27me3 in honeybee ovaries. The anterior of the ovaries is to the left and the posterior is to the right. Scale bars represent 100  $\mu\text{m}$ .



293  
294

**Supplementary Table 1: Clusters of genes more highly expressed in queen-right worker ovaries as compared with queen-less worker ovaries.**

| Contig         | Start   | End     | Genes                                                                              |
|----------------|---------|---------|------------------------------------------------------------------------------------|
| NW_003377909.1 | 131693  | 142178  | Apd-2 Apd-1 Apd-3                                                                  |
| NW_003377938.1 | 1340295 | 1360388 | LOC408559 LOC408557 Metap2 Ndufb2                                                  |
| NW_003377939.1 | 142302  | 176114  | LOC726297 Crc LOC727647 Echs1                                                      |
| NW_003377965.1 | 21550   | 41017   | LOC724405 LOC724488 LOC100576174 LOC410087 LOC724449 LOC724274 LOC724231 LOC724367 |
| NW_003377972.1 | 882860  | 942841  | Ppt1 LOC409495 LOC412589 LOC412416 LOC727483                                       |
| NW_003377974.1 | 294779  | 334123  | SP10 LOC724208 LOC409378 LOC411720                                                 |
| NW_003377989.1 | 1220196 | 1263459 | LOC551946 LOC551968 Dhpr LOC552018 mRpL43                                          |
| NW_003377999.1 | 1105    | 21501   | LOC411477 LOC552476 LOC411476                                                      |
| NW_003377999.1 | 1705343 | 1788934 | LOC100577440 LOC100577887 Rps8 B-gluc1 LOC552341 MED10                             |
| NW_003378009.1 | 830749  | 901643  | Vps25 LOC413630 LOC100188940 LOC100579049 Eaat-3 Unc-89                            |
| NW_003378029.1 | 1293139 | 1349024 | LOC410024 LOC410023 Appl                                                           |
| NW_003378036.1 | 160294  | 262584  | LOC724585 LOC409360 LOC412458 Spase22-23 Oscillin RpL10Ab LOC724721 Tal            |
| NW_003378039.1 | 2140985 | 2188370 | SP8 LOC726323 Sema-5c Gad1 LOC408510 Tsf1                                          |
| NW_003378039.1 | 2202418 | 2245807 | LOC726459 Mgat2 LOC552461 LOC408516 LOC552410                                      |
| NW_003378045.1 | 128258  | 172938  | Trx-2 LOC409452 LOC100578434 LOC100577712                                          |
| NW_003378048.1 | 681261  | 708411  | LOC100578046 LOC725171 LOC725147 LOC100578864                                      |
| NW_003378055.1 | 1029216 | 1044860 | LOC100576140 LOC551794 LOC551844                                                   |
| NW_003378056.1 | 57987   | 93179   | LOC726513 Plap Mkp3 LOC552503                                                      |
| NW_003378062.1 | 917531  | 941608  | LOC725310 Atg8a RpL22                                                              |
| NW_003378065.1 | 2302    | 50118   | CYP6AS3 CYP6AS7 Cyp6as5 CYP6AS4                                                    |
| NW_003378075.1 | 879313  | 968786  | LOC100576703 LOC550921 LOC100577643 LOC411171                                      |
| NW_003378088.1 | 2218959 | 2274779 | LOC727007 LOC552447 LOC727012 LOC410337 LOC552460                                  |
| NW_003378088.1 | 4512794 | 4595091 | Rpn12 Arp11 LOC100576421 LOC413145                                                 |
| NW_003378093.1 | 451854  | 499999  | LOC410996 Trim9 LOC410999 LOC408784                                                |
| NW_003378095.1 | 548027  | 574107  | ATF-3-like LOC726721 AlkB                                                          |
| NW_003378115.1 | 458954  | 533968  | LOC724886 Fem Csd                                                                  |
| NW_003378123.1 | 2182091 | 2205050 | LOC408669 LOC552073 fat-spondin                                                    |
| NW_003378123.1 | 2704646 | 2715995 | LOC551290 RpS3 Kr-h2 LOC410828                                                     |
| NW_003378143.1 | 211668  | 260964  | CBP LOC412620 nrv2                                                                 |
| NW_003378179.1 | 1199905 | 1248539 | sim LOC552014 LOC412734                                                            |

295  
296  
297  
298  
299  
300

**Supplementary Table 2: Clusters of genes more highly expressed in queen-less worker ovaries as compared with queen-right worker ovaries**

| Contig         | Start   | End     | Genes                                                                 |
|----------------|---------|---------|-----------------------------------------------------------------------|
| NW_003377872.1 | 127227  | 150576  | Skp2 bor LOC726354 yps                                                |
| NW_003377884.1 | 307285  | 346469  | LOC727447 LOC552468 LOC413545                                         |
| NW_003377899.1 | 26605   | 56161   | LOC726735 LOC725270 LOC726812                                         |
| NW_003377923.1 | 1042854 | 1102753 | LOC551609 CTL6 Neos lqf                                               |
| NW_003377938.1 | 1773073 | 1826522 | LOC100578129 eIF5B LOC411469                                          |
| NW_003377939.1 | 1287641 | 1347844 | LOC551090 LOC412308 LOC726537 LOC726586 LOC726482 LOC551462 LOC551545 |
| NW_003377939.1 | 1734052 | 1815237 | JIL-1 LOC100576863 LOC411629 LOC413618 LOC412200                      |

|                |         |         |                                                                                      |
|----------------|---------|---------|--------------------------------------------------------------------------------------|
| NW_003377943.1 | 199684  | 316737  | Bre1 LOC413376 mip40 LOC412459 ksr                                                   |
| NW_003377988.1 | 289711  | 488782  | Tango13 LOC552192 LOC413341 LOC410940                                                |
| NW_003377991.1 | 1234979 | 1259341 | LOC408708 LOC725396 disp LOC100579058                                                |
| NW_003377999.1 | 1026249 | 1052660 | LOC409804 LOC413181 LOC412770                                                        |
| NW_003377999.1 | 2871013 | 2912289 | CycE LOC409009 LOC409010 LOC551265 tacc                                              |
| NW_003378010.1 | 569549  | 889360  | LOC408373 LOC413660 LOC408374                                                        |
| NW_003378016.1 | 110818  | 145322  | LOC409136 Usp7 LOC727236                                                             |
| NW_003378021.1 | 85636   | 385007  | His2Av LOC408936 LOC409212 LOC551661 rin                                             |
| NW_003378026.1 | 344614  | 390948  | LOC100576125 LOC724793 LOC411026                                                     |
| NW_003378026.1 | 1015806 | 1178716 | LOC100578579 LOC725208 SF3A1                                                         |
| NW_003378036.1 | 689871  | 736127  | LOC552294 yl FKBP59 LOC552206 LOC725945 LOC725746                                    |
| NW_003378039.1 | 1012359 | 1274621 | LOC100576569 LOC100576529 cpx                                                        |
| NW_003378039.1 | 3811747 | 3864107 | LOC411646 LOC412828 LOC411410                                                        |
| NW_003378041.1 | 12597   | 23701   | LOC413006 LOC100577382 LOC552151                                                     |
| NW_003378045.1 | 644423  | 720701  | LOC409292 LOC725524 rump RnrL LOC551566 LOC411970                                    |
| NW_003378056.1 | 533931  | 612107  | LOC413912 eIF3-S8 Vrp1 LOC412150 LOC413652 LOC552031 LOC551928 LOC410037             |
| NW_003378072.1 | 810884  | 835779  | LOC725656 CSN4 porin LOC725783 LOC409483                                             |
| NW_003378077.1 | 30989   | 964116  | LOC411218 LOC411219 LOC725329 LOC412491                                              |
| NW_003378082.1 | 762722  | 808796  | LOC726679 lin LOC408693                                                              |
| NW_003378082.1 | 1472095 | 1506705 | LOC411871 LOC409092 Hr78                                                             |
| NW_003378085.1 | 424887  | 436520  | Cap LOC552458 LOC410219                                                              |
| NW_003378088.1 | 384328  | 435567  | LOC413108 kinesin-3B LOC725821 LOC552833                                             |
| NW_003378088.1 | 2832581 | 2864895 | LOC551735 RnpS1 LOC551683                                                            |
| NW_003378088.1 | 4411349 | 4483656 | hyd bun polo LOC551146 LOC725822 SF3B3 LOC412409                                     |
| NW_003378093.1 | 1235363 | 1266830 | LOC100576412 Mad toc                                                                 |
| NW_003378095.1 | 511189  | 542332  | LOC726991 eIF5 LOC411293                                                             |
| NW_003378096.1 | 609642  | 643337  | LOC408850 LOC100578463 LOC100576817 LOC411891 Rox8                                   |
| NW_003378096.1 | 2454342 | 2530706 | LOC412707 flfl LOC552581 LOC412593 LOC413451 Mcm5 Pros26.4 LOC100576794 LOC100576413 |
| NW_003378122.1 | 567263  | 606011  | trio LOC410726 LOC725494 LOC100579041                                                |
| NW_003378123.1 | 457821  | 506755  | LOC409034 LOC550804 LOC725626                                                        |
| NW_003378123.1 | 2779459 | 2847427 | LOC409221 Rtf1 gish LOC725589                                                        |
| NW_003378125.1 | 788093  | 811878  | CDC45L LOC412599 LOC413805                                                           |
| NW_003378142.1 | 621104  | 650378  | LRP6 LOC413195 LOC724439 LOC552223                                                   |
| NW_003378145.1 | 153351  | 196397  | bys LOC100579034 LOC726703 LOC726737 Mcm7                                            |
| NW_003378152.1 | 48256   | 145271  | MED25 bora LOC409207 LOC100576966 LOC100576908 LOC552439 LOC727246 Rbf ade2          |
| NW_003378158.1 | 895870  | 977677  | Taf11 trc ns4 LOC412986                                                              |
| NW_003378169.1 | 623867  | 650160  | LOC406132 LOC726542 kinesin-5A LOC726468 LOC100577833 LOC726487                      |
| NW_003378177.1 | 143107  | 316988  | Sema-1 Nedd4 LOC725609                                                               |
| NW_003378184.1 | 125369  | 178820  | LOC413855 LOC411546 lqfR LOC412745                                                   |

301  
302  
303  
304  
305  
306

**Supplementary Table 3: Clusters of genes more highly expressed in queen-less worker ovaries (as compared with queen ovaries (Figure 1A), n = 27 genes).** Note that there are no clusters of genes detected amongst the 17 genes that are more highly expressed in queen ovaries (as compared with queen-less worker ovaries (Figure 1A), n=17 genes)

| Contig         | Start | End    | Genes                         | P-value  |
|----------------|-------|--------|-------------------------------|----------|
| NW_003378145.1 | 94732 | 110614 | LOC725404 LOC551176 LOC410075 | 3.27E-03 |

309

310

311  
312  
313  
314

**Supplementary Table 4: Sequencing and mapping statistics for RNA-seq and CHIP-seq data.**

| Sample             | Experiment | Replicate | Sequenced Reads | Mapped Reads | Mapping % |
|--------------------|------------|-----------|-----------------|--------------|-----------|
| Queen-right worker | RNA-seq    | R1        | 7,160,479       | 6,984,615    | 97.54%    |
|                    |            | R2        | 6,964,277       | 6,803,982    | 97.70%    |
| Queen-less worker  | RNA-seq    | R1        | 7,503,621       | 7,366,395    | 98.17%    |
|                    |            | R2        | 7,008,828       | 6,878,686    | 98.14%    |
| Queen              | RNA-seq    | R1        | 7,192,461       | 7,066,000    | 98.24%    |
|                    |            | R2        | 7,196,797       | 7,064,478    | 98.16%    |
| Queen-right worker | H3K27me3   | R1        | 49,224,202      | 41,865,623   | 85.05%    |
|                    |            | R2        | 46,305,790      | 38,654,583   | 83.48%    |
|                    |            | Input     | 50,868,146      | 39,470,263   | 77.59%    |
| Queen-less worker  | H3K27me3   | R1        | 46,100,192      | 38,749,832   | 84.06%    |
|                    |            | R2        | 55,190,016      | 46,411,815   | 84.09%    |
|                    |            | Input     | 78,982,855      | 65,395,372   | 82.80%    |
| Queen              | H3K27me3   | R1        | 29,967,216      | 25,845,807   | 86.25%    |
|                    |            | R2        | 32,415,752      | 27,970,006   | 86.29%    |
|                    |            | Input     | 46,341,751      | 38,152,701   | 82.33%    |

315  
316

317  
318  
319  
320

**Supplementary Table 5: Clusters of genes associated with differential expression in previously published *A. mellifera* RNA-seq datasets**; two data sets associated with plasticity (Cameron, et al. 2013; Nie, et al. 2018) and three associated with non-plastic physiological changes (Mao, et al. 2013; Corby-Harris, et al. 2014; Pires, et al. 2016).

|                                  |                                                                       |                                          |                       |              |                         |              | Any overlap with honeybee ovary clusters |              | Strict overlap with honeybee ovary clusters |              |
|----------------------------------|-----------------------------------------------------------------------|------------------------------------------|-----------------------|--------------|-------------------------|--------------|------------------------------------------|--------------|---------------------------------------------|--------------|
|                                  |                                                                       | Number of differentially expressed genes | Clusters (gene based) | significance | Clusters (length based) | significance | gene based                               | Length based | gene based                                  | Length based |
| <b>Cameron et al., 2012</b>      | <b>Queen vs. worker destined larvae 60h</b>                           |                                          |                       |              |                         |              |                                          |              |                                             |              |
|                                  | Queen                                                                 | 1831                                     | 38                    | 0.131        | 42                      | 0.0081       | 6                                        | 12           | 5                                           | 5            |
|                                  | Worker                                                                | 423                                      | 2                     | 0.0171       | 4                       | 0.099        | 0                                        | 1            | 0                                           | 0            |
| <b>Corby-Harris et al., 2014</b> | <b>Effect of diet and age on transcription in abdomen (minus gut)</b> |                                          |                       |              |                         |              |                                          |              |                                             |              |
|                                  | Rich Diet vs. Poor Diet                                               |                                          |                       |              |                         |              |                                          |              |                                             |              |
|                                  | Rich                                                                  | 10                                       | 0                     | 1            | 0                       | 1            | 0                                        | 0            | 0                                           | 0            |
|                                  | Poor                                                                  | 0                                        | n/a                   | n/a          | n/a                     | n/a          | 0                                        | 0            | 0                                           | 0            |
|                                  | Young vs. old                                                         |                                          |                       |              |                         |              |                                          |              |                                             |              |
|                                  | Young                                                                 | 72                                       | 0                     | 1            | 0                       | 1            | 0                                        | 0            | 0                                           | 0            |
|                                  | Old                                                                   | 17                                       | 0                     | 1            | 0                       | 1            | 0                                        | 0            | 0                                           | 0            |
|                                  | Rich Diet vs. Poor diet at 3 days                                     |                                          |                       |              |                         |              |                                          |              |                                             |              |
|                                  | Rich                                                                  | 132                                      | 2                     | 0.0016       | 2                       | 0.0118       | 1                                        | 1            | 1                                           | 0            |
|                                  | Poor                                                                  | 16                                       | 0                     | 1            | 0                       | 1            | 0                                        | 0            | 0                                           | 0            |
|                                  | Rich Diet vs. Poor diet at 8 days                                     |                                          |                       |              |                         |              |                                          |              |                                             |              |
|                                  | Rich                                                                  | 6358                                     | 18                    | 0.814        | 39                      | 0.7503       | 2                                        | 8            | 0                                           | 2            |
|                                  | Poor                                                                  | 2947                                     | 31                    | 0.6433       | 40                      | 0.585        | 3                                        | 9            | 0                                           | 1            |
|                                  | Young vs. Old on a poor diet                                          |                                          |                       |              |                         |              |                                          |              |                                             |              |
|                                  | Young                                                                 | 71                                       | 0                     | 1            | 0                       | 1            | 0                                        | 0            | 0                                           | 0            |
|                                  | Old                                                                   | 13                                       | 0                     | 1            | 0                       | 1            | 0                                        | 0            | 0                                           | 0            |
|                                  | Young vs. Old on a rich diet                                          |                                          |                       |              |                         |              |                                          |              |                                             |              |
|                                  | Young                                                                 | 32                                       | 2                     | 0            | 2                       | 0            | 1                                        | 2            | 1                                           | 0            |
|                                  | Old                                                                   | 21                                       | 0                     | 1            | 0                       | 1            | 0                                        | 0            | 0                                           | 0            |
| <b>Mao et al., 2013</b>          | <b>Transcriptional effect of p-coumaric acid on midgut</b>            |                                          |                       |              |                         |              |                                          |              |                                             |              |
|                                  | Control                                                               | 154                                      | 0                     | 1            | 0                       | 1            | 0                                        | 0            | 0                                           | 0            |
|                                  | p-coumaric acid                                                       | 106                                      | 1                     | 0.5316       | 0                       | 1            | 0                                        | 0            | 0                                           | 0            |
| <b>Nie et al., 2018</b>          | <b>Antennae of workers performing different tasks</b>                 |                                          |                       |              |                         |              |                                          |              |                                             |              |
|                                  | Forager                                                               | 1710                                     | 49                    | 0.0004       | 41                      | 0.113        | 1                                        | 1            | 0                                           | 0            |

|  |         |      |    |         |    |        |   |   |   |   |
|--|---------|------|----|---------|----|--------|---|---|---|---|
|  | New     | 1957 | 42 | 0.0048  | 52 | 0.0289 | 2 | 7 | 0 | 1 |
|  | Forager | 228  | 1  | 0.0329  | 1  | 0.0962 | 1 | 1 | 0 | 0 |
|  | Nurse   | 152  | 0  | 0.0898  | 1  | 0.248  | 0 | 0 | 0 | 0 |
|  | Nurse   | 754  | 34 | 0.00008 | 29 | 0.0133 | 4 | 3 | 3 | 2 |
|  | New     | 978  | 17 | 0.4026  | 15 | 0.7193 | 1 | 2 | 1 | 0 |

| Pires et al., 2016 |                                  | Gene expression changes during embryogenesis |    |        |    |        |   |    |   |   |
|--------------------|----------------------------------|----------------------------------------------|----|--------|----|--------|---|----|---|---|
|                    | Diploid oocyte vs. diploid 2 hrs |                                              |    |        |    |        |   |    |   |   |
|                    | Oocyte                           | 823                                          | 14 | 0.0025 | 8  | 0.542  | 3 | 1  | 1 | 0 |
|                    | 2 hrs                            | 3385                                         | 69 | 0      | 76 | 0      | 5 | 20 | 2 | 8 |
|                    | Diploid oocyte vs. diploid 6 hrs |                                              |    |        |    |        |   |    |   |   |
|                    | Oocyte                           | 488                                          | 2  | 0.169  | 4  | 0.17   | 1 | 1  | 0 | 0 |
|                    | 6 hrs                            | 4256                                         | 61 | 5e-04  | 83 | 0      | 1 | 19 | 1 | 2 |
|                    | 6h vs 18 hrs                     |                                              |    |        |    |        |   |    |   |   |
|                    | 6 hrs                            | 2369                                         | 16 | 0.7005 | 16 | 0.1162 | 0 | 3  | 0 | 2 |
|                    | 18 hrs                           | 2527                                         | 28 | 0.9904 | 32 | 0.0615 | 3 | 6  | 2 | 3 |

321  
322  
323  
324

325  
326

**Supplementary Table 6: Oligonucleotide primer sequences used in this study**

| Primer                                         | NCBI Gene ID      | 5' primer                                | 3' primer                  | Fragment size |
|------------------------------------------------|-------------------|------------------------------------------|----------------------------|---------------|
| <b>Figure 3 Expression of PRC 2 components</b> |                   |                                          |                            |               |
| E(Z)                                           | LOC552235         | TCTGCAGAAGATGCTTTAAATACGA                | CGCATGGTTCAGCAAAAGGT       | 117           |
| Eed                                            | LOC551412         | CTACCCGCAGTGCTCGTTAT                     | ACTCCAAACAATGGCTGTCC       | 136           |
| Su(z)12                                        | LOC409170         | AGAAAACCCAGGTGTTCTGTG                    | CAGAAACCTGCATAATTGGTGA     | 161           |
| Caf1                                           | LOC552200         | TCAGTAAAATTGGCGAGGAACA                   | GGCAGTATGACCACCATGAATAA    | 87            |
| <b>Figure S1 Validation of RNA-seq data</b>    |                   |                                          |                            |               |
| Ago3                                           | LOC725111         | GTAAATTAGGTGGAGCACTTTGG                  | AAACCAGCTACACTACCTTTTCATTG | 118           |
| Aub                                            | Aub,<br>LOC412427 | GATACCATCAACTCCAGAAAATATACA              | GCTTGTAGCATTACATTACTTCCAGT | 90            |
| Deltex                                         |                   | Duncan <i>et al.</i> , 2016 <sup>1</sup> |                            |               |
| Fringe                                         |                   | Duncan <i>et al.</i> , 2016 <sup>1</sup> |                            |               |
| GB10585<br>(Her)                               |                   | Duncan <i>et al.</i> , 2016 <sup>1</sup> |                            |               |
| Gmap                                           | LOC411348         | TGTAAATGGCGTGGTTCCG                      | TTTGCTTCCTTCAGTGCTTTC      | 140           |
| Neuralised                                     |                   | Duncan <i>et al.</i> , 2016 <sup>1</sup> |                            |               |
| Notch                                          |                   | Duncan <i>et al.</i> , 2016 <sup>1</sup> |                            |               |
| Numb                                           |                   | Duncan <i>et al.</i> , 2016 <sup>1</sup> |                            |               |
| Serrate                                        |                   | Duncan <i>et al.</i> , 2016 <sup>1</sup> |                            |               |
| Vg                                             | Vg, LOC406088     | GACGTATCCCTGGCTCTGGA                     | TCGAGTCGTGGTCAAATTG        | 103           |
| VgR                                            | yl, LOC725920     | ATCGCTGTGAAACCGAGAA                      | TTGCCATTGTATTGGATCG        | 104           |
| <b>Figure S5 Validation of ChIP-seq data</b>   |                   |                                          |                            |               |
| Br-c                                           | Br-c              | CTCCATCGCCTGTCATTTTT                     | CGGGGTAAAGGGGAGAGAG        | 118           |
| bHLH2                                          | LOC100578067      | CTTCTGCAGAGGGTTCCAAG                     | TCACCGACACCTAGAAGAACC      | 113           |
| GB10585<br>(Her)                               | LOC724465         | GACAGTTGGTGGGGGAAAG                      | TGTTCAAGTCGATTCTCAGC       | 78            |
| Caf1                                           | LOC552200         | TCAGTAAAATTGGCGAGGAACA                   | GGCAGTATGACCACCATGAATAA    | 173           |
| Mir79                                          | Mir79             | AAAATTCAGTAAGTAAGGTCAAACAAA              | TTGTTGTATTCAATATCCACTCAGTT | 120           |
| Lethal 7                                       | LOC724488         | CTATCGGTAGCCGGTGCTAT                     | TCAAGCTTCTCTCTCGAGTGTTT    | 81            |
| Lethal 5                                       | LOC724488         | ATTGCGCCTGCTTGAAAAT                      | GTTCCACACGGACTGCTGTA       | 103           |

<sup>1</sup> Duncan, E.J., Hyink, O., and Dearden, P.K. (2016). Notch signalling mediates reproductive constraint in the adult worker honeybee. *Nature Communications* 7.

327  
328  
329  
330  
331  
332  
333  
334  
335  
336  
337  
338  
339  
340

341 **Supplementary references**

- 342 Cameron RC, Duncan EJ, Dearden PK. 2013. Biased gene expression in early honeybee larval  
343 development. *BMC Genomics* 14:903.
- 344 Cline MS, Smoot M, Cerami E, Kuchinsky A, Landys N, Workman C, Christmas R, Avila-Campilo I, Creech  
345 M, Gross B, et al. 2007. Integration of biological networks and gene expression data using Cytoscape.  
346 *Nature protocols* 2:2366.
- 347 Corby-Harris V, Jones BM, Walton A, Schwan MR, Anderson KE. 2014. Transcriptional markers of sub-  
348 optimal nutrition in developing *Apis mellifera* nurse workers. *BMC Genomics* 15:134.
- 349 Evans KJ, Huang N, Stempor P, Chesney MA, Down TA, Ahringer J. 2016. Stable *Caenorhabditis elegans*  
350 chromatin domains separate broadly expressed and developmentally regulated genes. *Proceedings of*  
351 *the National Academy of Sciences* 113:E7020-E7029.
- 352 Huang DW, Sherman BT, Lempicki RA. 2009. Systematic and integrative analysis of large gene lists using  
353 DAVID bioinformatics resources. *Nature protocols* 4:44-57.
- 354 Iovino N, Ciabrelli F, Cavalli G. 2013. PRC2 controls *Drosophila* oocyte cell fate by repressing cell cycle  
355 genes. *Developmental cell* 26:431-439.
- 356 Mao W, Schuler MA, Berenbaum MR. 2013. Honey constituents up-regulate detoxification and immunity  
357 genes in the western honey bee *Apis mellifera*. *Proc Natl Acad Sci U S A* 110:8842-8846.
- 358 Misof B, Liu S, Meusemann K, Peters RS, Donath A, Mayer C, Frandsen PB, Ware J, Flouri T, Beutel RG, et  
359 al. 2014. Phylogenomics resolves the timing and pattern of insect evolution. *Science* 346:763-767.
- 360 Nie H, Xu S, Xie C, Geng H, Zhao Y, Li J, Huang WF, Lin Y, Li Z, Su S. 2018. Comparative transcriptome  
361 analysis of *Apis mellifera* antennae of workers performing different tasks. *Mol Genet Genomics*  
362 293:237-248.
- 363 Pauler FM, Sloane MA, Huang R, Regha K, Koerner MV, Tamir I, Sommer A, Aszodi A, Jenuwein T, Barlow  
364 DP. 2009. H3K27me3 forms BLOCs over silent genes and intergenic regions and specifies a histone  
365 banding pattern on a mouse autosomal chromosome. *Genome Research* 19:221-233.
- 366 Pignatelli M, Serras F, Moya A, Guigo R, Corominas M. 2009. CROC: finding chromosomal clusters in  
367 eukaryotic genomes. *Bioinformatics* 25:1552-1553.
- 368 Pires CV, Freitas FC, Cristino AS, Dearden PK, Simoes ZL. 2016. Transcriptome Analysis of Honeybee  
369 (*Apis Mellifera*) Haploid and Diploid Embryos Reveals Early Zygotic Transcription during Cleavage.  
370 *PLoS One* 11:e0146447.
- 371 Prokopuk L, Stringer JM, Hogg K, Elgass KD, Western PS. 2017. PRC2 is required for extensive  
372 reorganization of H3K27me3 during epigenetic reprogramming in mouse fetal germ cells. *Epigenetics*  
373 *& Chromatin* 10:7.
- 374 Shen L, Shao NY, Liu X, Maze I, Feng J, Nestler EJ. 2013. diffReps: detecting differential chromatin  
375 modification sites from ChIP-seq data with biological replicates. *PLoS One* 8:e65598.
- 376 Simola DF, Graham RJ, Brady CM, Enzmann BL, Desplan C, Ray A, Zwiebel LJ, Bonasio R, Reinberg D,  
377 Liebig J. 2016. Epigenetic (re) programming of caste-specific behavior in the ant *Camponotus*  
378 *floridanus*. *Science* 351:aac6633.
- 379 Simola DF, Ye C, Mutti NS, Dolezal K, Bonasio R, Liebig J, Reinberg D, Berger SL. 2013. A chromatin link to  
380 caste identity in the carpenter ant *Camponotus floridanus*. *Genome Research* 23:486-496.
- 381 Wilson MJ, Abbott H, Dearden PK. 2011. The evolution of oocyte patterning in insects: multiple cell-signaling  
382 pathways are active during honeybee oogenesis and are likely to play a role in axis patterning. *Evol*  
383 *Dev* 13:127-137.

384
